# Supplementary material for: Closing the loop: life cycle assessment and optimization of a PEMFC platinum-based catalyst recycling process
Source: Royal Society of Chemistry journal article supplement (doi:10.1039/c9gc03630j), 2020-01-01
Supplement: c9gc03630j1.pdf [file c9gc03630j1.pdf]

## Electronic Supplementary information

Lucien Duclos,<sup>a</sup> Raphaël Chattot,<sup>a</sup> Laetitia Dubau,<sup>a</sup> Pierre-Xavier Thivel<sup>a</sup>, Guillaume Mandil,<sup>b</sup> Valérie Laforest,<sup>c</sup> Marco Bolloli,<sup>d</sup> Rémi Vincent<sup>d</sup> and Lenka Svecova\*<sup>a</sup>,

<sup>a</sup> Univ. Grenoble Alpes, Univ. Savoie Mont Blanc, CNRS, Grenoble INP, LEPMI, 38000 Grenoble, France.

<sup>b</sup> Univ. Grenoble Alpes, CNRS, G-SCOP, 38 000 Grenoble, France

<sup>c</sup> Mines Saint-Etienne, Univ Lyon, Univ Jean Moulin, Univ Lumière, Univ Jean Monnet, ENTPE, INSA Lyon, ENS Lyon, CNRS, UMR 5600 EVS, Institut Henri Fayol, Département GEO, F - 42023 Saint-Etienne France.

<sup>d</sup> Univ. Grenoble Alpes, CEA, LITEN, DEHT, LAP, F-38000 Grenoble, France

\*corresponding author

### 1. Pt/Co separation – feasibility study

At first a feasibility study was carried out in order to verify whether a selective separation of Pt from Co could be achieved. Within the feasibility study, each operation was performed only once. Although a very efficient leaching of both metallic elements can be obtained using the H<sub>2</sub>O<sub>2</sub>/HCl mixture, this operation is however not selective. It was thus further investigated whether both metals could be separated within the following separation steps. However, it was observed that no selective separation can be achieved when the solvent extraction or ion exchange are carried out (Table S1). Both metals are extracted/sorbed simultaneously in the case of both separation techniques tested in this work. When only one separation stage is carried out up to 82% of Pt can be extracted using Cyanex 923 in octanol extraction system, but 60% of Co are also co-extracted. In the case of Lewatit MP 62 ion exchange resin, slightly lower removal efficiency have been observed for separated both elements separated. In order to increase the removal efficiencies a multi-stage separation operation must thus be carried-out.

**Table S1:** Influence of separation alternation, on the Pt and Co removal efficiency from MEA leachate (T = 25°C; Solvent: 15% Cyanex 923 in octanol, A/O=1, t=5 min; Resin: 20g Lewatit MP62 L<sup>-1</sup>, 5h).

|         | Extraction efficiencies |     |
|---------|-------------------------|-----|
|         | Co                      | Pt  |
| Solvent | 60%                     | 82% |
| Resin   | 37%                     | 72% |

Afterwards, regeneration tests with NaOH solutions were performed so as to test the feasibility of Pt/Co separation from the loaded solvent and resin phases recovered after the extraction tests. In the case of solvent back extraction the NaOH concentration range tested varied from 0 to 3 mol L<sup>-1</sup> and the results are shown in **Figure S1**. Simple water stripping seems to be very efficient to recover Co, however more than 50% of Pt are co-stripped too. When the NaOH concentration is increased in the stripping media the Pt stripping efficiency increases significantly and Co stripping remains still high. However, a very interesting phenomenon appears when the NaOH exceeds 2.8 mol L<sup>-1</sup>. Beyond this concentration in the stripping media the cobalt ions undergo an immediate and quantitative precipitation (certainly due to cobalt oxide (CoO<sub>4</sub>) or hydroxides (Co(OH)<sub>2</sub> or Co(OH)<sub>3</sub>) formation in basic conditions<sup>1</sup>). Thus a selective separation can be achieved by what will be further called Solvent alternative where Co is recovered as a solid after an additional filtration step, while Pt stays in alkaline solution and will further be re-used.

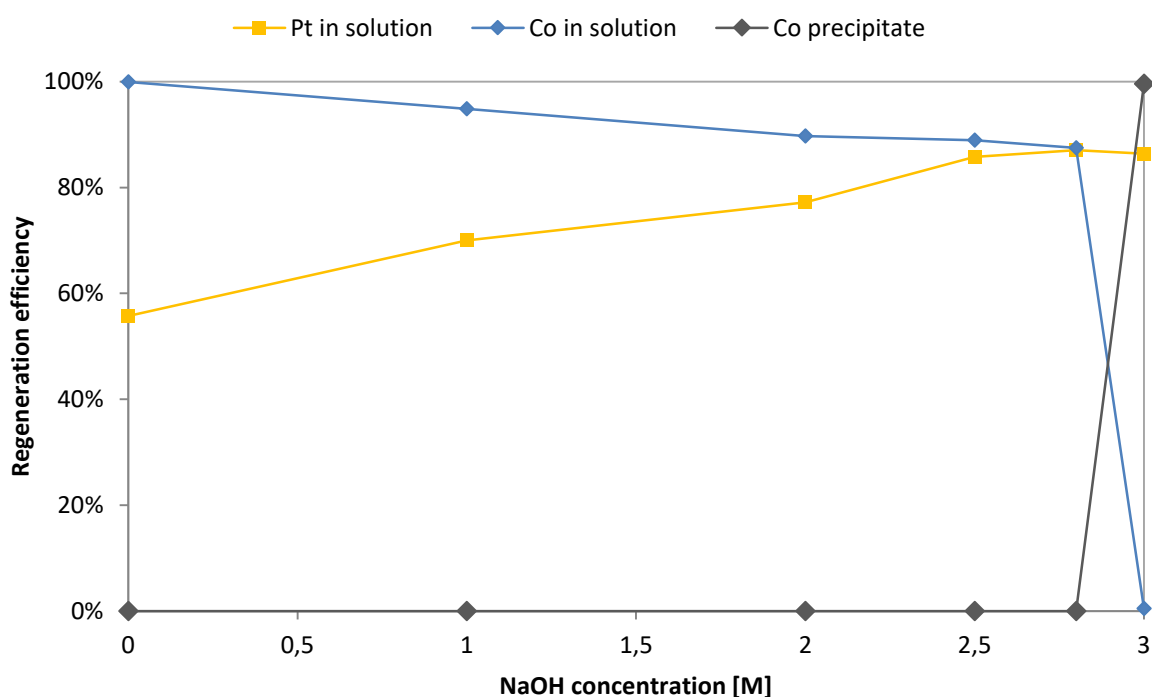

**Figure S1:** Influence of NaOH concentration, on Pt-Co back-extraction efficiency from 15% vol Cyanex 923/Octanol organic phase ( $T = 25\text{ }^{\circ}\text{C}$ ,  $C_{\text{Lix}}^{\text{Pt}} = 2\text{ g L}^{-1}$ ,  $C_{\text{Lix}}^{\text{Co}} = 0.2\text{ g L}^{-1}$  O/A = 1;  $t_{\text{stripping}} = 5\text{ min}$ ,  $t_{\text{settling}} = 30\text{ min}$ ).

In the case of ion exchange resin desorption, the influence of NaOH concentration was only studied within the 0 – 1 mol L<sup>-1</sup> range and the results are displayed in Figure S2. Interestingly, a simple water flushing of the saturated resin can be sufficient to desorb a significant quantity of Co without desorbing Pt desorption. The Pt can then be selectively desorbed by alkaline rinsing. The NaOH concentration increase leads to an important Pt desorption efficiency increase from 1 to 81 % on the range 0.1 – 0.25 mol L<sup>-1</sup> and has no significant influence on Pt desorption for higher NaOH concentrations. More than 99% of the cobalt can be desorbed from the loaded resin with aqueous solutions containing NaOH concentrations on the range 0 – 0.1 mol L<sup>-1</sup>. However, using higher NaOH concentrations in the regeneration solution leads to cobalt precipitation in the form of cobalt oxides or hydroxides, as observed in the solvent tests. In this case the Pt/Co separation can be performed in two successive steps:

- cobalt desorption from the resin by water flushing,
- platinum recovery in solution using a 0.25 - 1 mol L<sup>-1</sup> NaOH solution.

The experimental results have shown that the Pt/Co separation can be performed after the platinum extraction step. The metal separation is simpler with the resin as no precipitation is involved in this case, Co is recovered as aqueous solution which can be re-used in other applications, while Pt is kept in the alkaline solution which will be re-used for Pt/C re-synthesis.

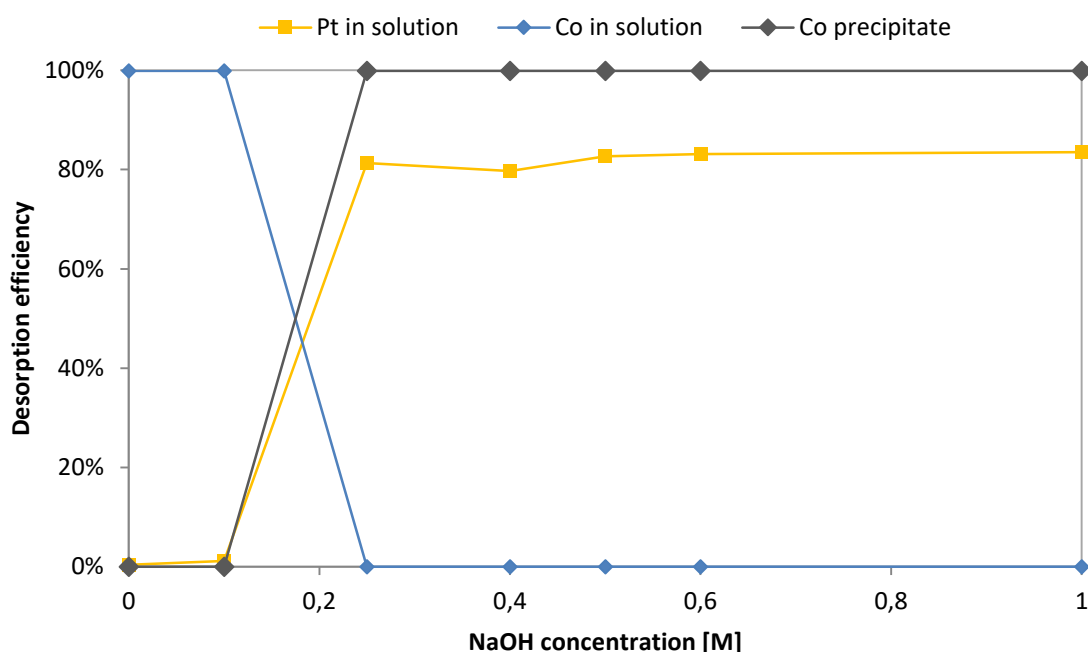

**Figure S2:** Influence of NaOH concentration, on Pt-Co separation from saturated Lewatit MP62 resin ( $T = 25\text{ }^{\circ}\text{C}$ ,  $C_{\text{Lix}}^{\text{Pt}} = 2\text{ g L}^{-1}$ ,  $C_{\text{Lix}}^{\text{Co}} = 0.2\text{ g L}^{-1}$ ,  $\%_{\text{Resine}} = 20\text{ g L}^{-1}$ ,  $t = 30\text{ minutes}$ ).

## 2. Separation Pt/Co – optimization study

**Table S2:** Overview of optimized process parameters for selective Pt/Co separation from used MEAs of a PEMFC.

| Stage                    | Temperature | Products                                    | Parameter                | Value                 |
|--------------------------|-------------|---------------------------------------------|--------------------------|-----------------------|
| <b>Recycling part</b>    |             |                                             |                          |                       |
| Leaching                 | 25 °C       | H <sub>2</sub> O <sub>2</sub> /HCl solution | Oxidant concentration    | 3 vol.%               |
|                          |             |                                             | Pt/leaching solution     | 2 g L <sup>-1</sup>   |
| Resin separation         | 25 °C       | Lewatit-MP-62                               | R/A ratio                | 20 g L <sup>-1</sup>  |
|                          |             |                                             | Stages number            | 3                     |
| Co desorption            |             | Water                                       | /                        | /                     |
|                          |             | Lewatit-MP-62                               | R/A ratio                | 20 g L <sup>-1</sup>  |
| Pt desorption            |             | NaOH solution                               | Concentration            | 1 mol L <sup>-1</sup> |
|                          |             | Lewatit-MP-62                               | R/A ratio                | 20 g L <sup>-1</sup>  |
|                          |             |                                             | Stages number            | 3                     |
| Liquid-liquid extraction | 25 °C       | Cyanex 923/Octanol                          | Extractant concentration | 15 vol.%              |
|                          |             |                                             | O/A ratio                | 1                     |
|                          |             |                                             | Stages number            | 3                     |
| Pt and Co stripping      |             | NaOH solution                               | Concentration            | 3 mol L <sup>-1</sup> |
|                          |             |                                             | O/A ratio                | 1                     |
|                          |             |                                             | Stages number            | 3                     |

### 3. Pt/C synthesis

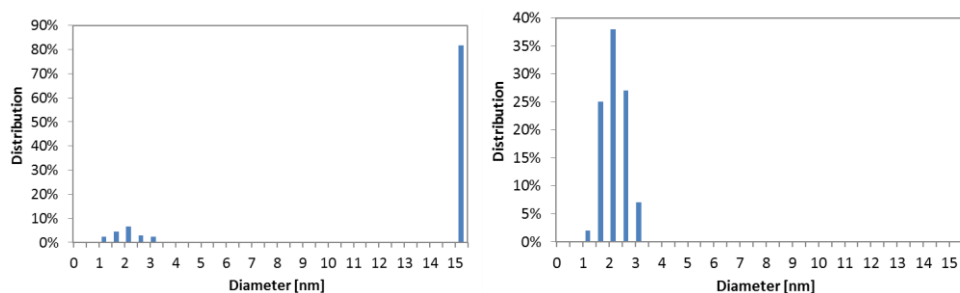

Figure S3 Pt particle size distribution of Pt/C synthesized from (right) solvent regeneration and (left) resin desorption solution with polyol process.

### 4. Life cycle assessment

**Table S3:** Recycling processes energy and mass balance including wastes treatment (amounts per kg of Pt at process inlet).

| <b>Process inlets</b>                            |               |                            |              |
|--------------------------------------------------|---------------|----------------------------|--------------|
| <b>Products/</b>                                 | <i>energy</i> | <b>Alternative Solvent</b> | <b>Resin</b> |
| Nafion <sup>®</sup> (kg)                         |               | 0.7                        | 0.7          |
| 20% PtM/C(kg)                                    |               | 5                          | 5            |
| HCl without water (kg)                           |               | 208                        | 208          |
| H <sub>2</sub> O <sub>2</sub> without water (kg) |               | 5                          | 5            |
| Deionised water (kg)                             |               | 5300                       | 5000         |
| Cyanex <sup>®</sup> 923 (kg)                     |               | 156                        | /            |
| Pentanol (kg)                                    |               | 827                        | /            |
| Anionic resin (kg)                               |               | /                          | 60           |
| NaOH without water (kg)                          |               | 595                        | 180          |
| NH <sub>4</sub> Cl (kg)                          |               | 124                        | /            |
| <i>Electricity low voltage {RER} (MJ)</i>        |               | 800                        | 1700         |
| <b>Process outlets</b>                           |               |                            |              |
| <b>Wastes or products/ treatment process</b>     |               | <b>Alternative Solvent</b> | <b>Resin</b> |
| <b>Solid wastes</b>                              | Pt (kg)       | 0.24                       | 0.28         |

|                           |                                                                                          |      |      |
|---------------------------|------------------------------------------------------------------------------------------|------|------|
|                           | Carbon black (kg)                                                                        | 5    | 5    |
|                           | <i>Hazardous waste, for incineration {GLO}</i><br>(kg)                                   | 5.3  | 5.3  |
|                           | Nafion® (kg)                                                                             | 0.7  | 0.7  |
|                           | <i>Nafion incinerator (kg)</i>                                                           | 0.7  | 0.7  |
|                           | Anionic resin (kg)                                                                       | /    | 60   |
|                           | <i>Spent anion exchange resin from potable<br/>water production {GLO}</i> (kg)           | /    | 120  |
|                           | HCl (kg)                                                                                 | 283  | 268  |
|                           | <i>Hydrochloric acid neutralization</i> (kg)                                             | 284  | 269  |
|                           | Water (kg)                                                                               | 5500 | 5000 |
| <b>Aqueous<br/>wastes</b> | H <sub>2</sub> O <sub>2</sub> (kg)                                                       | 4    | 4    |
|                           | NaOH (kg)                                                                                | 595  | 180  |
|                           | NH <sub>4</sub> Cl (kg)                                                                  | 124  | /    |
|                           | <i>Wastewater, average {CH} treatment of<br/>capacity 4.7E10l/year</i> (m <sup>3</sup> ) | 5.5  | 5.0  |
| <b>Organic<br/>wastes</b> | Cyanex® 923 (kg)                                                                         | 156  | /    |
|                           | Pentanol (kg)                                                                            | 827  | /    |
|                           | <i>Spent solvent mixture {GLO}</i> (kg)                                                  | 983  | /    |
| <b>Products</b>           | PtCl <sub>6</sub> <sup>2-</sup> in solution without water (kg of Pt)                     | 0.83 | 0.77 |

**Table S4:** Pt/C synthesis process energy and mass balance including wastes treatment (amounts per kg of Pt at process inlet).

| <b>Process inlets</b>                                                   |                        |
|-------------------------------------------------------------------------|------------------------|
| <b>Products/energy</b>                                                  | <b>Polyol process</b>  |
| Deionised water (kg)                                                    | 750                    |
| Ethylene glycol (kg)                                                    | 2200                   |
| Ar (kg)                                                                 | 340                    |
| H <sub>2</sub> SO <sub>4</sub>                                          | 9                      |
| Carbon black (kg)                                                       | 4                      |
| <i>Electricity low voltage {RER} (MJ)</i>                               | 120000                 |
| <b>Process outlets</b>                                                  |                        |
| <b>Wastes/treatment process</b>                                         | <b>Polyols process</b> |
| <b>Gaseous emissions</b>                                                |                        |
| Argon (kg)                                                              | 9                      |
| <b>Aqueous wastes</b>                                                   |                        |
| Water (kg)                                                              | 1000                   |
| <i>Wastewater, average {CH} treatment of capacity 4.7E10l/year (m3)</i> | 1                      |
| <b>Organic wastes</b>                                                   |                        |
| Ethylene glycol (kg)                                                    | 2200                   |
| <i>Spent solvent mixture {GLO} (kg)</i>                                 | 2200                   |

The fluoropolymer H<sup>+</sup> sites can be converted in alkali metal group cation form so as to avoid the electrolyte degradation during the dissolution step. The required equivalent of sodium hydroxide amount for acid site neutralisation was estimated considering a 1 meq g<sup>-1</sup> membrane capacity<sup>2</sup> and the following reaction (R representing the fluoropolymer skeleton) :

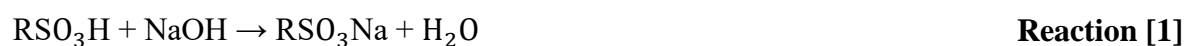

The solvent consumption of the dissolution process was calculated considering a 5% Nafion<sup>®</sup> concentration in the obtained organic solution (corresponding to fluoropolymer concentration in commercial solutions). The process energy utilization was estimated from laboratory reflux system power.

An evaporation process followed by a solvent condensation step was selected so as to model solvent/Nafion<sup>®</sup> separation. The energy consumption was estimated by adding the sensible and latent heats necessary for solvent evaporation from 25 °C. The solvent condensation with water through a heat exchanger was chosen. The water consumption was determined performing a

heat balance considering a maximal water temperature increase of 10 °C. The water pumping impact was modelled with the module: "*Tap water {Europe without Switzerland}/ tap water production, underground water without treatment*". The EcoInvent incineration module: "*Spent solvent mixture {GLO}*", was used so has to consider the solvent elimination.

**Table S5:** Membrane dissolution step energy and mass balance including wastes treatment (amounts per membrane surface at process inlet in m<sup>-2</sup>).

| <b>Process inlets</b>                                                                                   |                                           |     |
|---------------------------------------------------------------------------------------------------------|-------------------------------------------|-----|
| <b>Products/energy</b>                                                                                  | <b>DMSO dissolution process</b>           |     |
| Deionised water (kg)                                                                                    | 5                                         |     |
| Dimethylsulfoxide (kg)                                                                                  | 7.5                                       |     |
| NaOH without water (kg)                                                                                 | 0.01                                      |     |
| <i>Electricity low voltage {RER} (MJ)</i>                                                               | 40                                        |     |
| <b>Process outlets</b>                                                                                  |                                           |     |
| <b>Wastes/treatment process</b>                                                                         | <b>DMSO dissolution process</b>           |     |
| <b>Aqueous wastes</b> Water (kg)                                                                        | 5.0                                       |     |
|                                                                                                         | Dimethylsulfoxide (kg)                    | 7.5 |
| <b>Organic wastes</b> <i>Spent solvent mixture {GLO} (kg)</i>                                           | 7.5                                       |     |
|                                                                                                         | <i>Electricity low voltage {RER} (MJ)</i> | 7   |
| <b>Nafion®/solvent separation</b> <i>Tap water production, underground water without treatment (kg)</i> | 170                                       |     |

## References

- 1 M. Pourbaix, J. Van Muylder and N. De Zoubov, *Electrochemical equilibriums atlas at 25°C (in French)*, Gauthier-Villars et Cie, 1963.
- 2 Chemours Product bulletin P-12, [https://www.chemours.com/Nafion/en\\_US/assets/downloads/dfc101.pdf](https://www.chemours.com/Nafion/en_US/assets/downloads/dfc101.pdf), (accessed 10 February 2019).
